# Supplementary material
Source: PubMed Central journal article supplement (PMC4327934)
Supplement: NIHMS662249-supplement-Supplement4.pdf [file NIHMS662249-supplement-Supplement4.pdf]

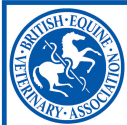

# Equine Veterinary Journal

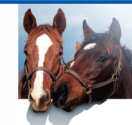

**Supplementary Item 4:** Diseases/traits in the horse with unknown modes of inheritance and genetic mutations not yet identified. Diseases and traits with active research into the genetic basis of the disease or functional genomic studies are **bolded** and references include these studies. Other traits/diseases are included based upon comparative information in other species and references include case descriptions. QH = American Quarter Horse, TB = Thoroughbred, WB = Warmblood. References can be found either in the main article or in Supplementary Item 5.

| <b>Disease/trait</b>                                                                        | <b>Breed(s)</b>                                                                          | <b>Reference(s)</b> |
|---------------------------------------------------------------------------------------------|------------------------------------------------------------------------------------------|---------------------|
| Alopecia areata                                                                             | Multiple; QH and Appaloosa most common                                                   | [107]               |
| Arthrogyposis                                                                               | Multiple; Arabian, QH, TB reported                                                       | [108]               |
| Occipitoatlantoaxial malformation;<br>occipitalisation of atlas and atlantalisation of axis | Primarily Arabian; also reported in Appaloosa, QH, Friesian,<br>Miniature horse          | [109; 110]          |
| Atresia coli                                                                                | Multiple                                                                                 | [111; 112]          |
| <b>Atrial fibrillation, lone</b>                                                            | <b>Standardbred</b>                                                                      | <b>[113]</b>        |
| <b>Body size</b>                                                                            | <b>Multiple</b>                                                                          | <b>[27; 34]</b>     |
| <b>Bone fracture, traumatic</b>                                                             | <b>Thoroughbred</b>                                                                      | <b>[114]</b>        |
| <b>Brachygnathia</b>                                                                        | <b>Multiple</b>                                                                          | <b>[115; 116]</b>   |
| Choanal atresia                                                                             | Multiple; reported in Standardbred, Thoroughbred, American<br>Miniature, Oldenburg horse | [117-122]           |
| Cleft palate                                                                                | Multiple                                                                                 | [123; 124]          |
| Coloboma                                                                                    | QH                                                                                       | [125-127]           |
| <b>Common Variable Immunodeficiency</b>                                                     | <b>Multiple</b>                                                                          | <b>[128]</b>        |
| Coxofemoral luxation                                                                        | Miniature horse                                                                          | [129; 130]          |
| <b>Cribbing (crib-biting)</b>                                                               | <b>Multiple</b>                                                                          | <b>[131]</b>        |
| <b>Cryptorchidism</b>                                                                       | <b>Multiple</b>                                                                          | <b>[132]</b>        |
| Curly coat                                                                                  | American Bashkir Curly Horse                                                             | [133]               |
| Cushing's disease                                                                           | Multiple                                                                                 | [134]               |

|                                                                                                                                                                                                                                                   |                                                                           |                   |
|---------------------------------------------------------------------------------------------------------------------------------------------------------------------------------------------------------------------------------------------------|---------------------------------------------------------------------------|-------------------|
| <b>Deafness, sensorineural</b>                                                                                                                                                                                                                    | <b>American Paint horse</b>                                               | <b>[135]</b>      |
| <b>Degenerative joint disease (osteoarthritis)</b>                                                                                                                                                                                                | <b>Multiple; genetic studies in Thoroughbreds and Icelandic horses</b>    | <b>[114; 136]</b> |
| <b>Degenerative myeloencephalopathy; also see neuroaxonal dystrophy</b>                                                                                                                                                                           | <b>Multiple</b>                                                           | <b>[137-139]</b>  |
| <b>Dwarfism</b>                                                                                                                                                                                                                                   | <b>American Miniature, Friesian</b>                                       | <b>[140]</b>      |
| Leukoencephalomyopathy, spongiform                                                                                                                                                                                                                | QH                                                                        | [141]             |
| Ectopic ureter                                                                                                                                                                                                                                    | Multiple                                                                  | [142-144]         |
| Endocardial fibroelastosis                                                                                                                                                                                                                        | QH                                                                        | [145]             |
| Entropion                                                                                                                                                                                                                                         | Multiple                                                                  | [146; 147]        |
| <b>Epilepsy, juvenile idiopathic</b>                                                                                                                                                                                                              | <b>Arabians</b>                                                           | <b>[148; 149]</b> |
| <b>Exercise-induced pulmonary haemorrhage</b>                                                                                                                                                                                                     | <b>Multiple</b>                                                           | <b>[150]</b>      |
| Glaucoma                                                                                                                                                                                                                                          | Multiple                                                                  | [151]             |
| <b>Guttural pouch tympany</b>                                                                                                                                                                                                                     | <b>Multiple; genetic studies in Arabians and German warmblood horses</b>  | <b>[35; 152]</b>  |
| Hemangiosarcoma                                                                                                                                                                                                                                   | Multiple: TB overrepresented                                              | [153]             |
| Heart defects including:<br>Ventricular septal defect<br>Atrial septal defect<br>Persistent ductus arteriosus<br>Tricuspid atresia<br>Tetrology of Fallot<br>Pentalogy of Fallot<br>Persistent right aortic arch<br>Persistent truncus arteriosus | Multiple; Arabian overrepresented                                         | [154-157]         |
| Hernia, diaphragmatic                                                                                                                                                                                                                             | Multiple                                                                  | [158]             |
| Hernia, inguinal                                                                                                                                                                                                                                  | Multiple                                                                  | [159-161]         |
| Hernia, scrotal                                                                                                                                                                                                                                   | Multiple                                                                  | [162]             |
| Hernia, umbilical                                                                                                                                                                                                                                 | Multiple                                                                  | [161; 163]        |
| Holoprosencephaly                                                                                                                                                                                                                                 | Morgan (1 report)                                                         | [164]             |
| Hydrocephalus                                                                                                                                                                                                                                     | Multiple, including Miniature horse, Friesian, Thoroughbred, Standardbred | [165; 166]        |
| Hyperbilirubinemia                                                                                                                                                                                                                                | Thoroughbred                                                              | [167]             |
| Hyperornithinemia, hyperammonemia and homocitrullinuria                                                                                                                                                                                           | Morgan                                                                    | [168]             |

|                                                                             |                                                                                |                      |
|-----------------------------------------------------------------------------|--------------------------------------------------------------------------------|----------------------|
| Hyperparathyroidism, primary                                                | Multiple                                                                       | [169; 170]           |
| Hyperthyroidism                                                             | Multiple                                                                       | [171; 172]           |
| Hypoadrenocorticism                                                         | Multiple                                                                       | [173]                |
| Hypoparathyroidism                                                          | Multiple                                                                       | [174-176]            |
| <b>Hypospadias</b>                                                          | <b>Friesian</b>                                                                | <b>[177-179]</b>     |
| Hypothyroidism                                                              | Multiple                                                                       | [180; 181]           |
| Hypotrichosis                                                               | Arabian, Appaloosa                                                             | [182]                |
| Immunoglobulin M deficiency, selective                                      | Arabian                                                                        | [183]                |
| <b>Impaired acrosomal reaction</b>                                          | <b>Multiple</b>                                                                | <b>[184]</b>         |
| <b>Insect bite hypersensitivity</b>                                         | <b>Multiple</b>                                                                | <b>[37; 185-189]</b> |
| <b>Intersex</b>                                                             | <b>Multiple</b>                                                                | <b>[190]</b>         |
| <b>Knobbed acrosome</b>                                                     | <b>Multiple</b>                                                                | <b>[191]</b>         |
| <b>Laminitis (research primarily focused on functional genomic studies)</b> | <b>Multiple</b>                                                                | <b>[42; 192-196]</b> |
| <b>Laryngeal neuropathy/paralysis, recurrent</b>                            | <b>Multiple; often taller breeds</b>                                           | <b>[33; 197]</b>     |
| Linear epidermal nevi                                                       | Belgian Draft                                                                  | [198]                |
| Lymphangiectasia                                                            | Standardbred (1 case reported)                                                 | [199]                |
| <b>Lymphedema, chronic progressive (chronic pastern dermatitis)</b>         | <b>Draft breeds</b>                                                            | <b>[200-202]</b>     |
| <b>Megaesophagus</b>                                                        | <b>Multiple, high prevalence in Friesian horse</b>                             | <b>[203; 204]</b>    |
| <b>Metabolic syndrome (i.e. insulin resistance)</b>                         | <b>Multiple</b>                                                                | <b>[205; 206]</b>    |
| <b>Motor neuron disease, lower</b>                                          | <b>Multiple; QH at higher risk</b>                                             | <b>[207; 208]</b>    |
| <b>Narcolepsy</b>                                                           | <b>Familial form: Miniature and Lippizan horse, Shetland and Suffolk pony</b>  | <b>[209; 210]</b>    |
| <b>Navicular disease</b>                                                    | <b>Multiple; genomics research in Hanoverian warmblood horses</b>              | <b>[211-214]</b>     |
| <b>Neuroaxonal dystrophy (see also degenerative myeloencephalopathy)</b>    | <b>Multiple</b>                                                                | <b>[139; 215]</b>    |
| Neuronal ceroid lipofuscinosis                                              | Icelandic x Peruvian Paso crossbred (3 distantly related cases)                | [216]                |
| <b>Squamous cell carcinoma, ocular</b>                                      | <b>Multiple; Draft breeds and Appaloosa overrepresented</b>                    | <b>[217]</b>         |
| Omphalocele                                                                 | Arabian (1 report)                                                             | [218]                |
| <b>Osteochondrosis/Osteochondritis dissecans</b>                            | <b>Multiple; genetic studies in Warmblood breeds, Trotters, Standardbreds,</b> | <b>[219-230]</b>     |
| Osteopetrosis                                                               | Peruvian Paso                                                                  | [231]                |
| Patellar luxation                                                           | Miniature horse                                                                | [232-234]            |

|                                                            |                                                                       |                        |
|------------------------------------------------------------|-----------------------------------------------------------------------|------------------------|
| Pemphigus foliaceus                                        | Multiple                                                              | [235; 236]             |
| Polycystic kidney disease                                  | Multiple                                                              | [237; 238]             |
| Polydactyly                                                | Multiple                                                              | [239]                  |
| <b>Polysaccharide storage myopathy, type 2</b>             | <b>Multiple</b>                                                       | <b>[240]</b>           |
| Portosystemic shunt                                        | Multiple                                                              | [241; 242]             |
| Prekallikrein deficiency                                   | Belgian Draft, Miniature horse                                        | [243; 244]             |
| <b>Recurrent airway obstruction</b>                        | <b>Multiple; genetic studies in European Warmblood breeds</b>         | <b>[245-250]</b>       |
| <b>Recurrent exertional rhabdomyolysis</b>                 | <b>Multiple; Thoroughbred and Standardbred overrepresented</b>        | <b>[251-255]</b>       |
| <b>Recurrent uveitis</b>                                   | <b>Multiple; Appaloosa and German Warmblood breed overrepresented</b> | <b>[36; 256; 257]</b>  |
| Renal dysplasia                                            | Reported in QH, TB, American Miniature                                | [258-261]              |
| <b>Sarcoid</b>                                             | <b>Multiple</b>                                                       | <b>[262; 263]</b>      |
| Schistosomus reflexus                                      | Multiple                                                              | [264]                  |
| Self-mutilation syndrome                                   | Multiple                                                              | [265]                  |
| <b>Sex-reversal: XY female, SRY-positive</b>               | <b>Multiple</b>                                                       | <b>[84]</b>            |
| <b>Shivers</b>                                             | <b>Multiple: TB, WB, Draft horses overrepresented</b>                 | <b>[266]</b>           |
| Situs inversus                                             | Standardbred (1 report)                                               | [267]                  |
| Stringhalt                                                 | Multiple                                                              | [268]                  |
| <b>Superficial digital flexor tendon injury</b>            | <b>Multiple; genetic studies in TB</b>                                | <b>[114; 269]</b>      |
| <b>Lordosis (swayback)</b>                                 | <b>Multiple; genetic studies in American Saddlebred</b>               | <b>[270]</b>           |
| Syringohydromyelia                                         | Multiple                                                              | [271]                  |
| Tendons, contracted                                        | Multiple                                                              | [272]                  |
| Testicular regression syndrome                             | Oldenburg (1 report)                                                  | [273]                  |
| Wryneck / ± torticollis                                    | Multiple; Draft horses overrepresented                                | [274]                  |
| Urolithiasis                                               | Multiple                                                              | [275]                  |
| <b>XX testicular disorder of sexual development</b>        | <b>American Saddlebred, Arabian, Lusitano, Paso Fino</b>              | <b>[132; 276; 277]</b> |
| Yellow fat disease (nutritional panniculitis or steatitis) | Appaloosa (1 report)                                                  | [278]                  |
